# Supplementary material for: New star-shape memory polyurethanes capable of thermally induced recovery and hydrogen bond-self-healing
Source: Royal Society of Chemistry journal article supplement (doi:10.1039/d1nj01237a), 2021-01-01
Supplement: d1nj01237a1.pdf [file d1nj01237a1.pdf]

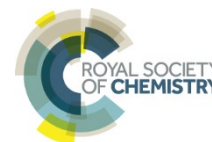

## New Journal of Chemistry

### Electronic Supplementary Information

## New Star-Shape Memory Polyurethane capable of thermal-induced recovery and hydrogen bond-Self Healing

Received 00th January 20xx,  
Accepted 00th January 20xx

Zonghui Huang, Jianfeng Ban\*, Lulu Pan, Shuqing Cai, Junqiu Liao\*

DOI: 10.1039/x0xx00000x

[www.rsc.org/](http://www.rsc.org/)

### Experimental section

**Materials.** All reagents were purchased and used without purification.

**Synthesis.** Star-Shaped Poly( $\epsilon$ -caprolactone) (3SPCL) was synthesized by the ring-opening polymerization method. First, a certain amount of 27.9 g of  $\epsilon$ -CL, 0.5 g of GI, and 0.1 g of  $\text{SnCl}_2$  were added into a 250 mL three flask. Then the polymerization was carried out at 140 °C for 6 h. After cooled to room temperature, the product was dissolved in 25 mL of  $\text{CH}_2\text{Cl}_2$  and precipitated in 800 mL of cold ethyl alcohol. Finally, the resulting precipitate was dried under a vacuum at 30 °C for 8 h to obtain the target polymers 3SPCL. The Star-Shaped Memory Polyurethane (3-SMPUn) were synthesized via solution polymerization with 3SPCL, BIN, and HDI. Using the synthesis of P1 as a model case, polymerization was started by adding 5.0 g of 3SPCL, 0.52 g of HDI, and 16 mL of DMF to a 250 mL conical flask equipped with a mechanical stirrer. This pre-polymer was constantly stirred at 80 °C for 1 h. And then, 0.62 g of BIN, 0.79 g of HDI, and 6 mL of DMF were added to the reaction mixture, which was then stirred for an additional 4 h. After stopping the reaction, 5 mL of ethanol was added drop wise into the flask. The resulting pre-polymer was then poured into a Teflon pan and post-cured at 80 °C for 24 h to obtain the target 3-SMPUn. The samples were coded as P1-P5 (3-SMPUn,  $n = 2.0, 2.5, 3.0, 3.5, \text{ and } 4.0$ , which is the molar ratio of BIN/3-SPCL).

**Measurements.** FT-IR spectra were scanned from smooth 0.2 mm thick polymer films using a Nicolet 760 FT-IR spectrometer by according to the FT-IR attenuated total reflection (ATR) method. Ten scans at a resolution of 4  $\text{cm}^{-1}$  were signal averaged and stored for further analysis. XRD experiments were performed using a BRUKER AXS D8 Advance diffractometer with a 40 kV FL tube as the X-ray source ( $\text{Cu K}\alpha$ ) and a LYNXEYE-XE detector. DSC was performed using a NETZSCH DSC214 instrument with nitrogen as the purged gas. Indium and zinc standards were used for calibration. Samples were first heated from 30 °C to 150 °C at a heating rate of 10 °C/min and kept at 160 °C for 2 min, subsequently, cooled to -20 °C at a cooling rate of 10 °C/min, and finally heated a second time from -20 °C to 160 °C. TGA curves were recorded on a computer-controlled NETZSCH Instrument TG209F3 system, under the following operational conditions: a heating rate of 10 °C/min, a temperature range of 35-600 °C, a sample weight of approximately 5.0 mg, using film samples in platinum crucibles, and 60 mL/min  $\text{N}_2$  flow. Three or four repeated readings (temperature and weight loss) were made for the same TG curve, and each included to at least 15 points. DMA curves were determined utilizing a DMA242E system (NETZSCH) at a heating rate of 2 °C  $\text{min}^{-1}$  under 1 Hz. The measured samples were cut into rectangle shape with a thickness of 0.5 mm.



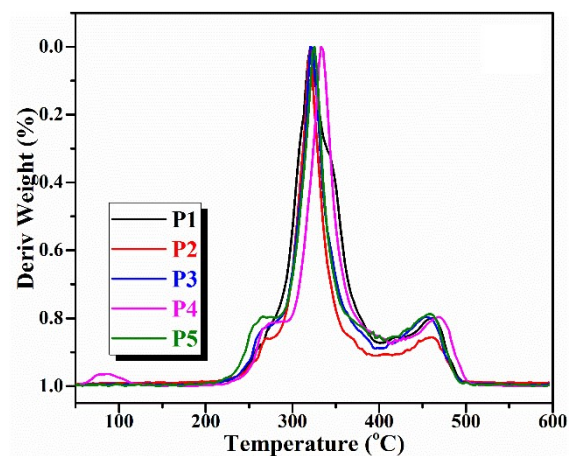

Fig. S1 Thermo-gravimetric analysis curves of the 3-SMPUn (weight loss rate with temperature).

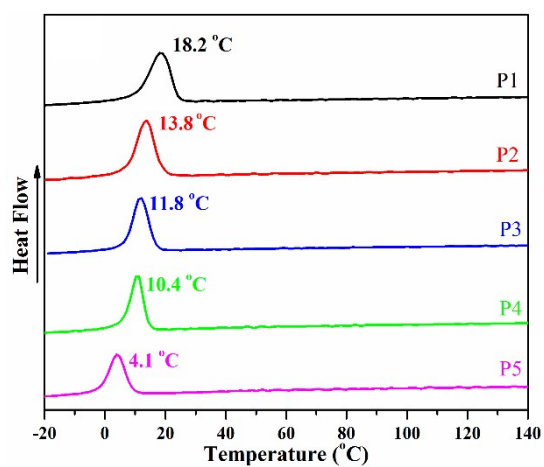

Fig. S2 DSC curves of 3-SMPUn at the first cooling run.
